# Supplementary material for: Goldenseal (Hydrastis canadensis L.) Extracts Inhibit the Growth of Fungal Isolates Associated with American Ginseng (Panax quinquefolius L.)
Source: MDPI journal article supplement (doi:10.3390/molecules29030556), 2024-01-23
Supplement: s1 [file s1]

## Supplementary Materials

**Table S1.** Molecular identification of the fungal isolates

| Sample      | Identification                   | ITS                 | EF - $\alpha$       | BT                  | SSU                 |
|-------------|----------------------------------|---------------------|---------------------|---------------------|---------------------|
| Ginseng 550 | <i>Pestalotiopsis</i> sp. *      | 100% to<br>MK336517 | 100% to<br>KU252416 | 100% to<br>KU252503 | -                   |
| Ginseng 549 | <i>Pestalotiopsis</i> sp. *      |                     |                     |                     |                     |
| Ginseng 549 | <i>Pestalotiopsis</i> sp. *      |                     |                     |                     |                     |
| Ginseng 550 | <i>Pestalotiopsis</i> sp. *      |                     |                     |                     |                     |
| Ginseng 487 | <i>Alternaria panax</i>          | 100% to<br>MK534893 | 100% to<br>LC480224 | -                   | 100% to<br>KC584549 |
| Ginseng 488 | <i>Alternaria panax</i>          |                     |                     |                     |                     |
| Ginseng 489 | <i>Fusarium sporotrichioides</i> | 100% to<br>MT635298 | 100% to<br>MN553802 | 100% to<br>AB587076 | -                   |

\*Note: *Pestalotiopsis* sp. was further identified as *P. nanjingensis* based on morphology and molecular characteristics [6].
